# Supplementary material for: Genome-wide bioinformatic analyses predict key host and viral factors in SARS-CoV-2 pathogenesis
Source: PubMed Central journal article supplement (PMC8128904; doi:10.1038/s42003-021-02095-0), 2021-05-17
Supplement: 42003_2021_2095_MOESM1_ESM.pdf [file 42003_2021_2095_MOESM1_ESM.pdf]

## Supplementary material for

# Genome-wide bioinformatic analyses predict key host and viral factors in SARS-CoV-2 pathogenesis

Mariana G. Ferrarini<sup>1\*</sup>, Avantika Lal<sup>2\*</sup>, Rita Rebollo<sup>1</sup>, Andreas J. Gruber<sup>3</sup>, Andrea Guarracino<sup>4</sup>, Itziar Martinez Gonzalez<sup>5</sup>, Taylor Floyd<sup>6</sup>, Daniel Siqueira de Oliveira<sup>7</sup>, Justin Shanklin<sup>8</sup>, Ethan Beausoleil<sup>8</sup>, Taneli Pusa<sup>9</sup>, Brett E. Pickett<sup>8#</sup>, Vanessa Aguiar-Pulido<sup>10#</sup>

\* These authors contributed equally

# Corresponding authors

<sup>1</sup> University of Lyon, INSA-Lyon, INRA, BF2I, Villeurbanne, France

<sup>2</sup> NVIDIA Corporation, Santa Clara, CA, USA

<sup>3</sup> Oxford Big Data Institute, Nuffield Department of Medicine, University of Oxford, Oxford, UK

<sup>4</sup> Centre for Molecular Bioinformatics, Department of Biology, University Of Rome Tor Vergata, Rome, Italy

<sup>5</sup> Amsterdam UMC, Amsterdam, The Netherlands

<sup>6</sup> Center for Neurogenetics, Weill Cornell Medicine, Cornell University, New York, NY, USA

<sup>7</sup> Laboratoire de Biométrie et Biologie Evolutive, Université de Lyon; Université Lyon 1; CNRS; UMR 5558, Villeurbanne, France

<sup>8</sup> Brigham Young University, Provo, UT, USA

<sup>9</sup> Luxembourg Centre for Systems Biomedicine, Belvaux, Luxembourg

<sup>10</sup> Department of Computer Science, University of Miami, Coral Gables, FL, USA

Emails for correspondence:

Brett E. Pickett: [brett\\_pickett@byu.edu](mailto:brett_pickett@byu.edu)

Vanessa Aguiar-Pulido: [vxa305@miami.edu](mailto:vxa305@miami.edu)

This document contains:

Supplementary Figures 1-6

Supplementary Tables 1-2

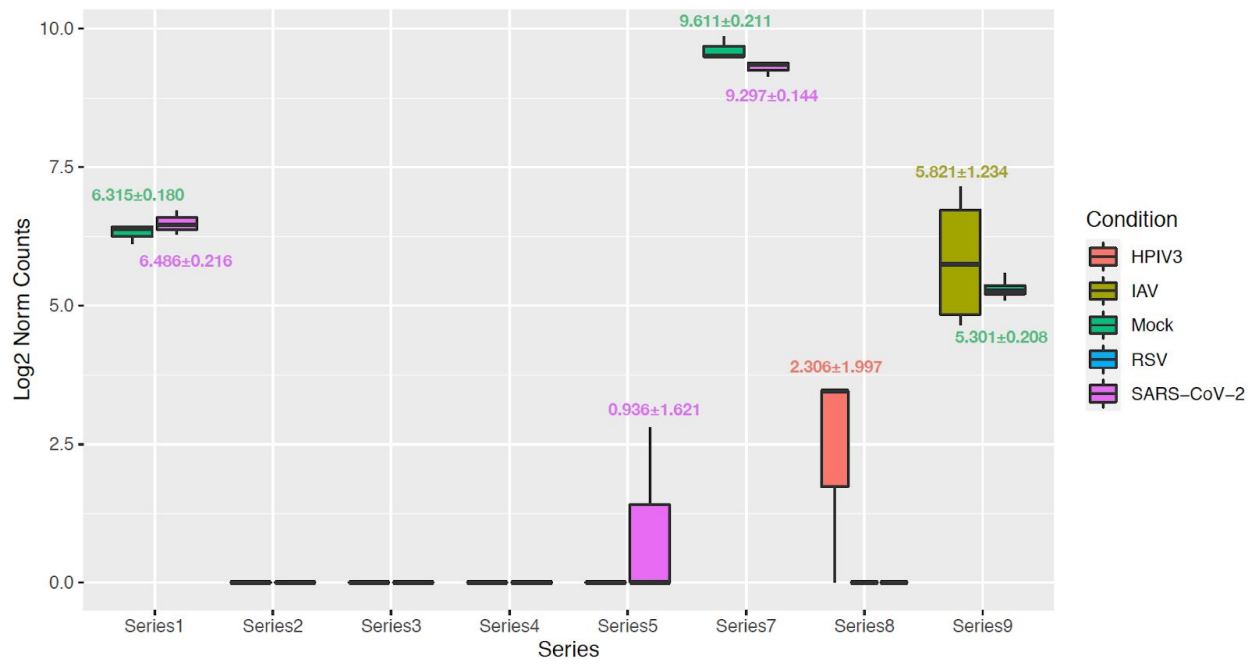

**Supplementary Figure 1. Expression of the *ACE2* viral receptor gene in each RNA-seq dataset.** The y-axis shows the log2 normalized counts for *ACE2* from DESeq2 results.

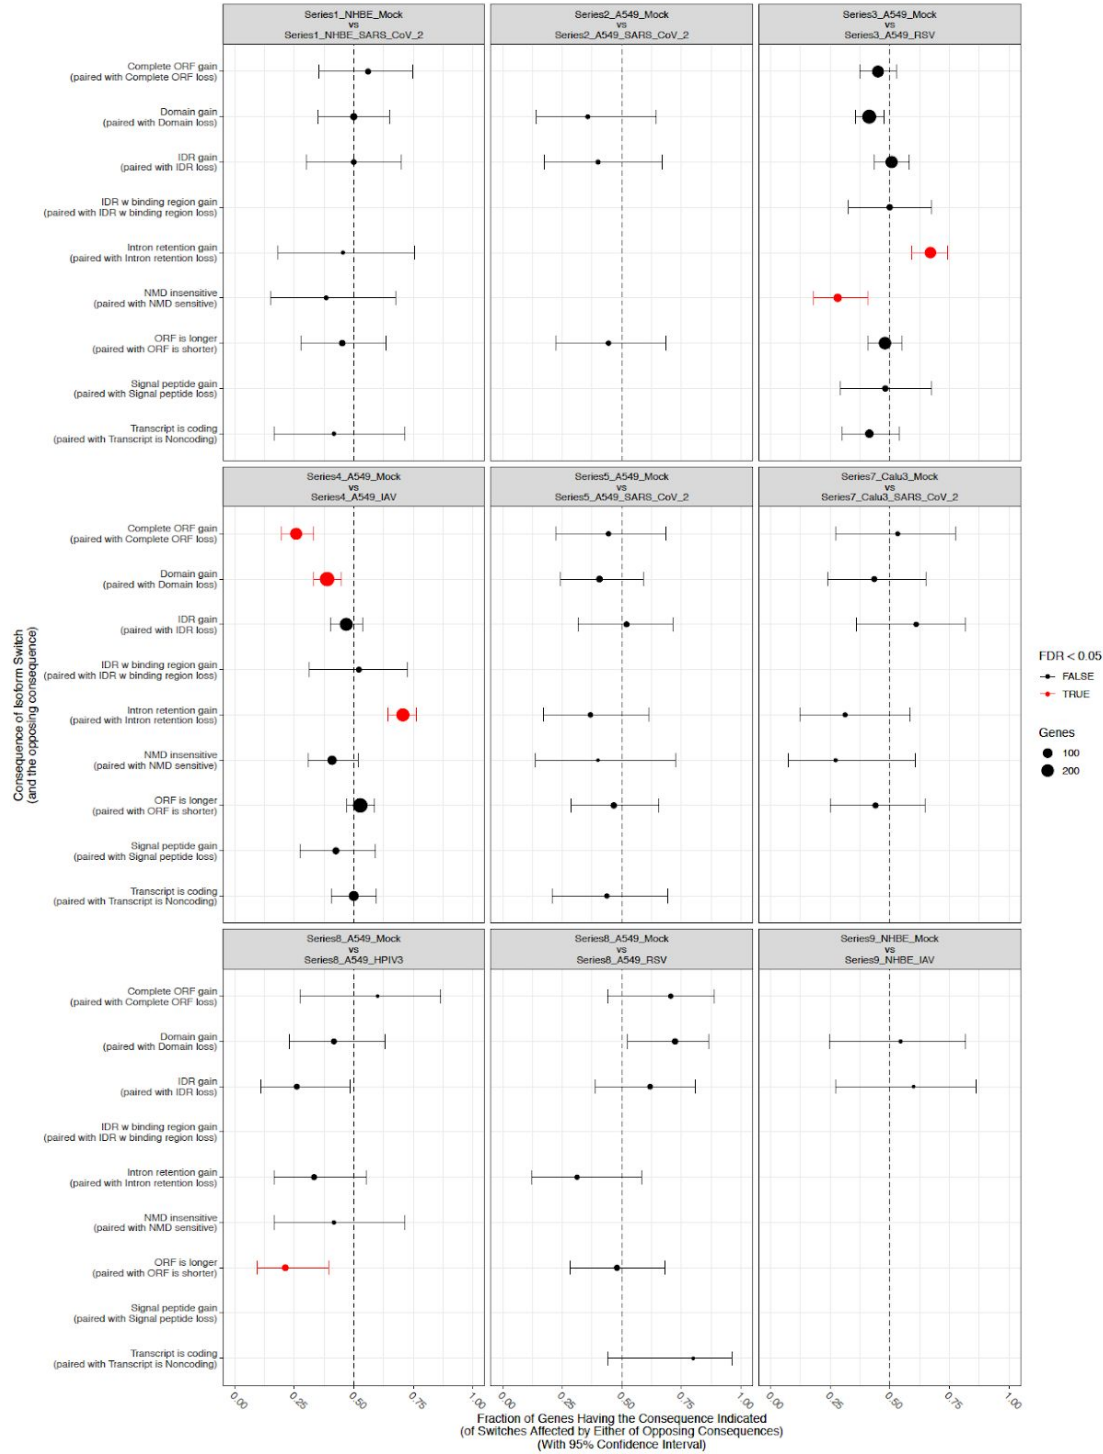

**Supplementary Figure 2. Biological consequence enrichment analysis.** A fraction of 0.5 on the x-axis (dashed line) suggests out of all significant isoforms experiencing consequence A (y-axis), 50% experience a gain in consequence A and 50% experience a loss in consequence A, indicating no global preference in the direction of consequence A for the isoform population. RSV, IAV, and HPIV3 infected samples exhibit significant global enrichment in consequences shortening the ORF, increasing sensitivity to NMD, and higher IR rates. Error bars represent 95% confidence intervals. Red error bars = significant consequence enrichment (adjusted p-value < 0.05), black error bars = non-significant consequence enrichment. ORF = open reading frame, IDR = intrinsically disordered region, NMD = nonsense-mediated decay.

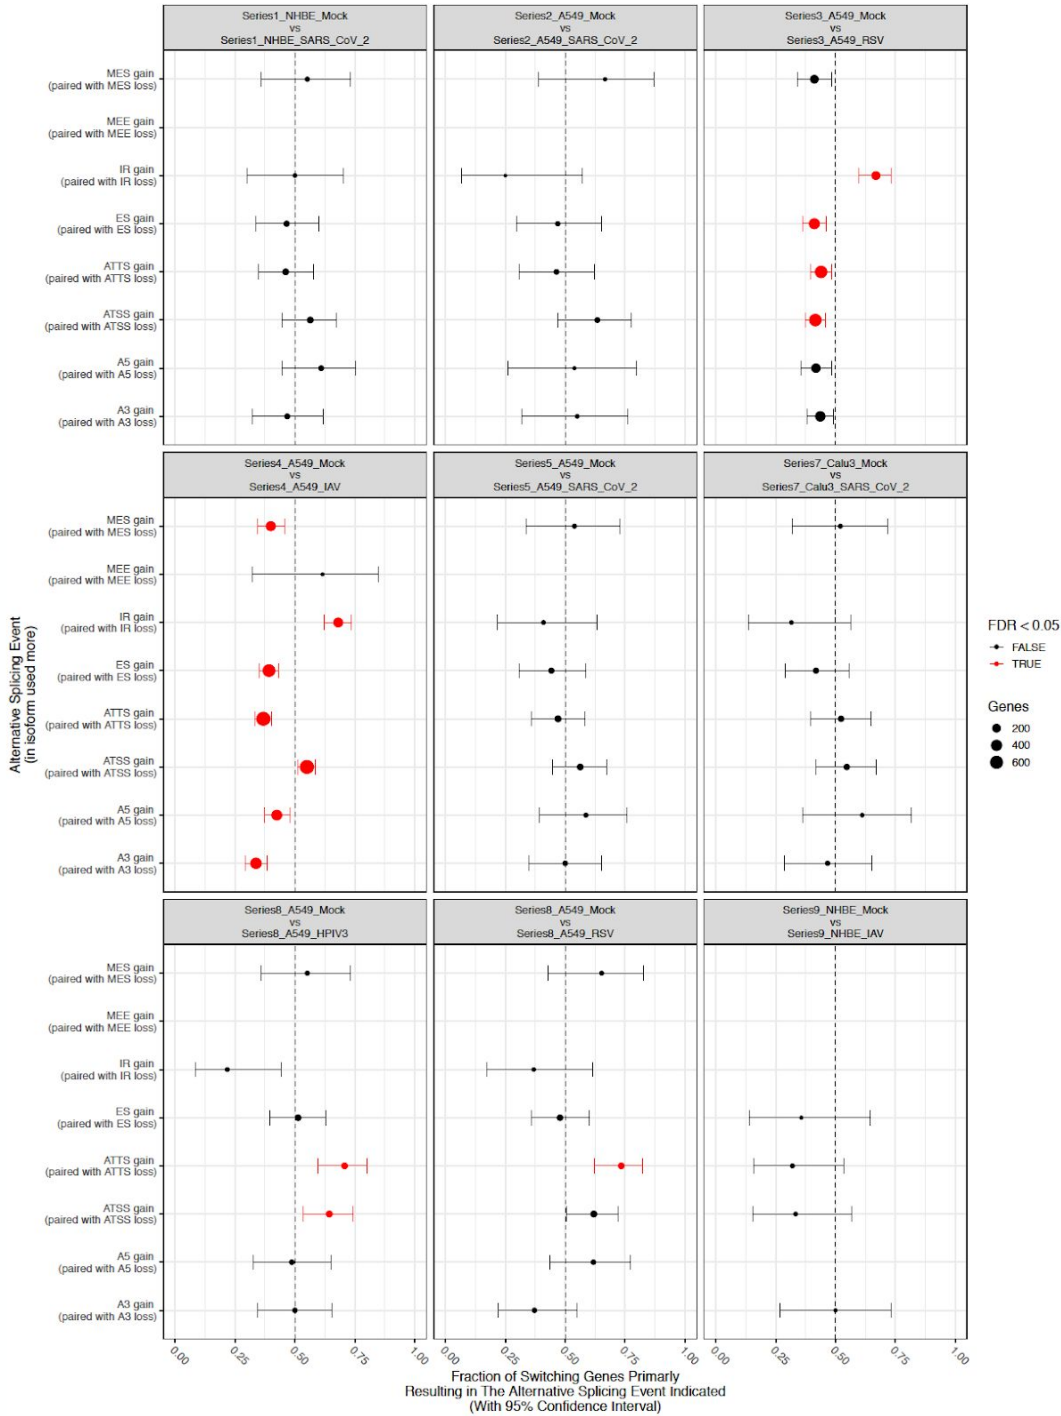

**Supplementary Figure 3. Enrichment analysis for alternative splicing events.** RSV, IAV, and HPIV3 infected samples display global enrichment of increased IR and ATSS, alongside decreased exon skipping (MES and ES), alternative splice site usage (A5 and A3), and ATTS. Error bars represent 95% confidence intervals. Red error bars = significant consequence enrichment (p-value < 0.05), black error bars = non-significant consequence enrichment. MES = multiple exon skipping, MEE = mutually exclusive exons, IR = intron retention, ES = exon skipping, ATTS = alternative transcription termination site, ATSS = alternative transcription start site, A5 = alternative 5' splice site, A3 = alternative 3' splice site.

### Top 30 Isoforms with Significant Gene Switch Usage

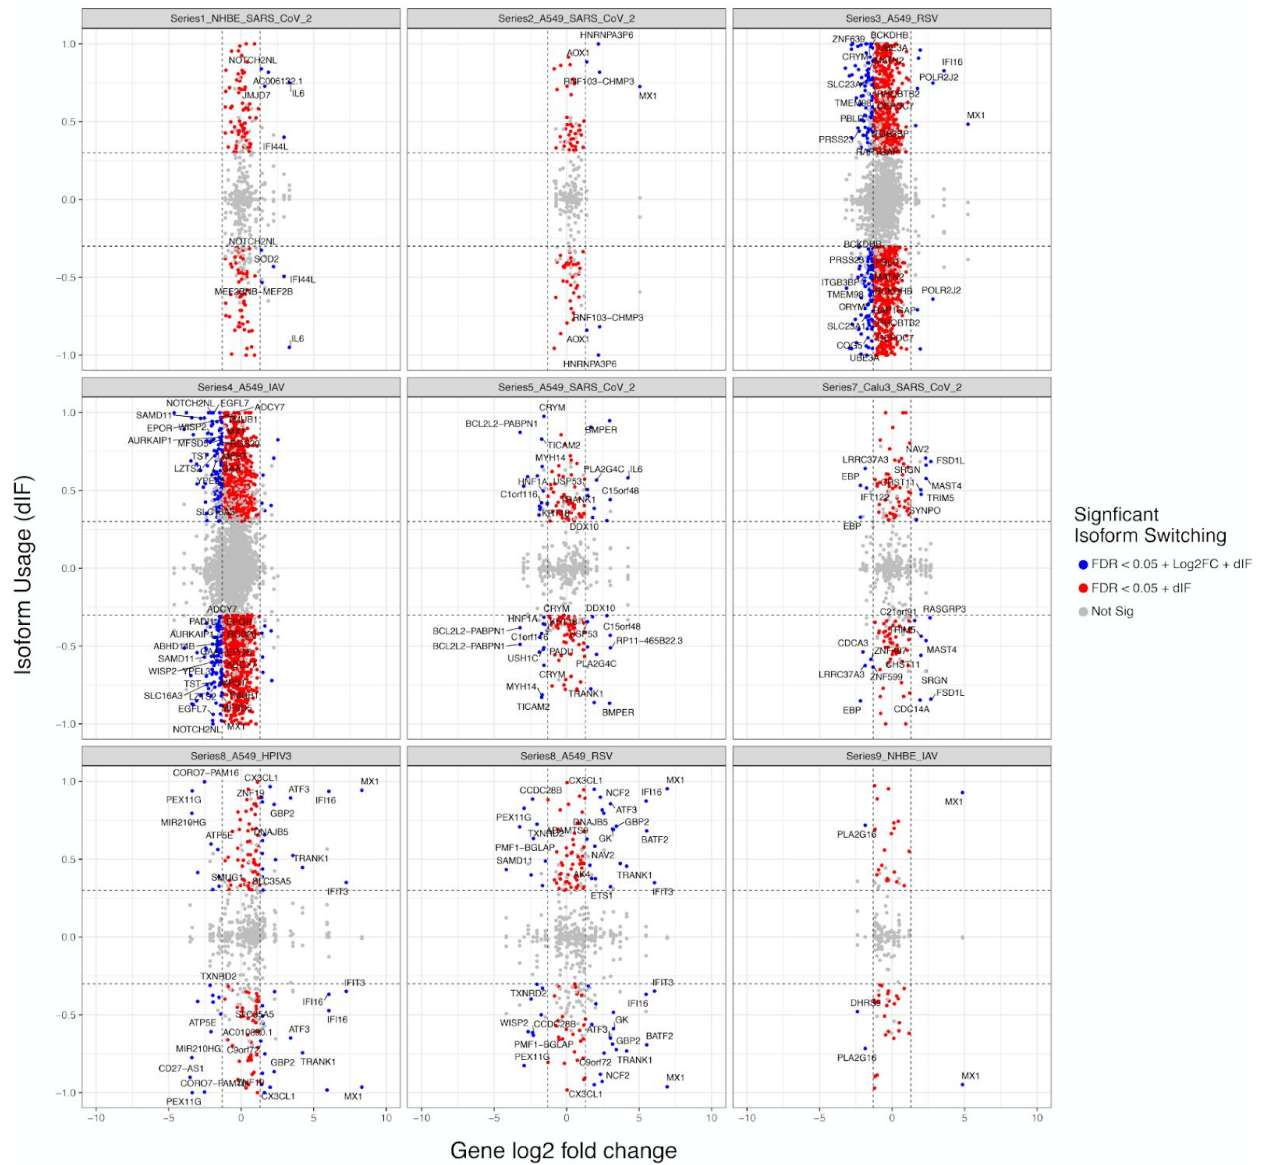

**Supplementary Figure 4. Top 30 isoforms experiencing significant isoform usage and differential gene expression.** Blue circles = isoforms experiencing significant switch in usage ( $dIF \geq |0.3|$ ), gene log<sub>2</sub> fold change  $\geq |1|$ , and adjusted p-value < 0.05; red circles = isoforms experiencing significant switch in usage ( $dIF \geq |0.3|$ ) and adjusted p-value < 0.05; gray circles = non-significant isoforms. Horizontal dotted lines =  $dIF \geq |0.3|$ , vertical dotted lines = gene log<sub>2</sub> fold change  $\geq |1|$ .

**A**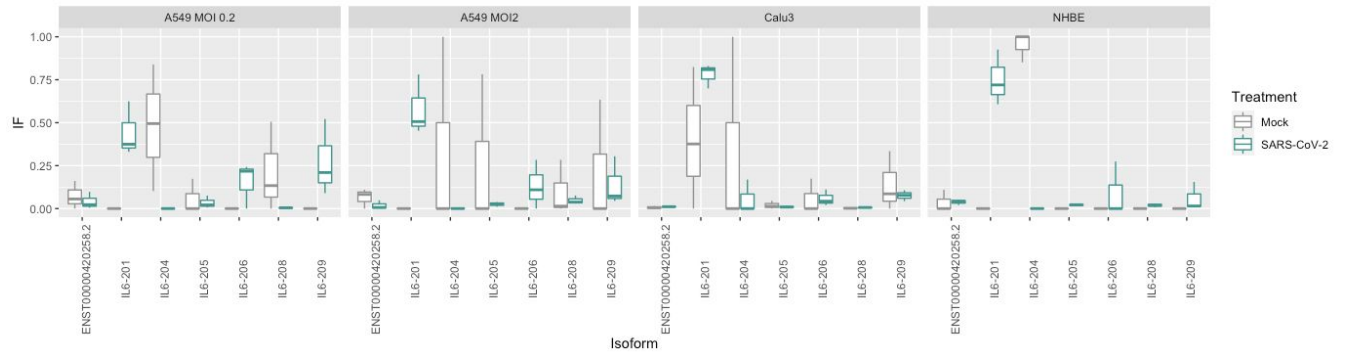**B**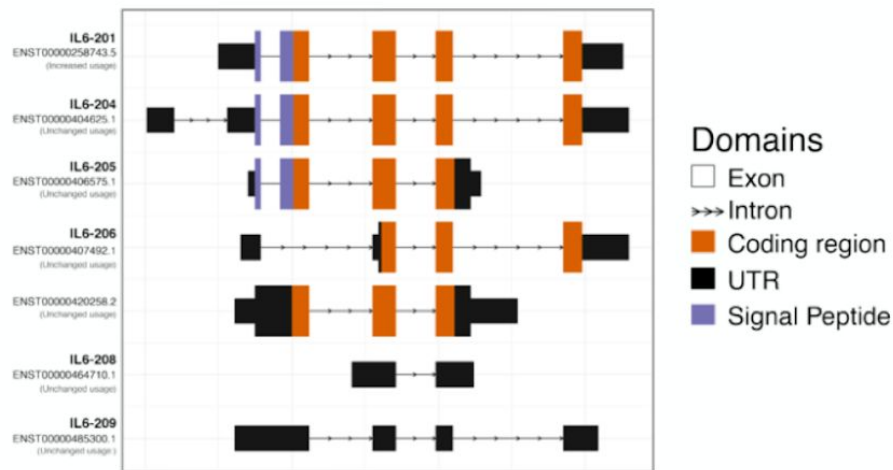

**Supplementary Figure 5. Isoform usage analyses specifically with *IL6* transcripts from IsoformSwitchAnalyzerR software.** A) Isoform fractions of the 7 detected *IL6* isoforms within the 4 datasets of cell lines infected with SARS-CoV-2. Boxplots represent biological triplicates of each condition B) Isoform splice graphs for the detected isoforms of *IL6*. MOI: Multiplicity of Infection.

**A**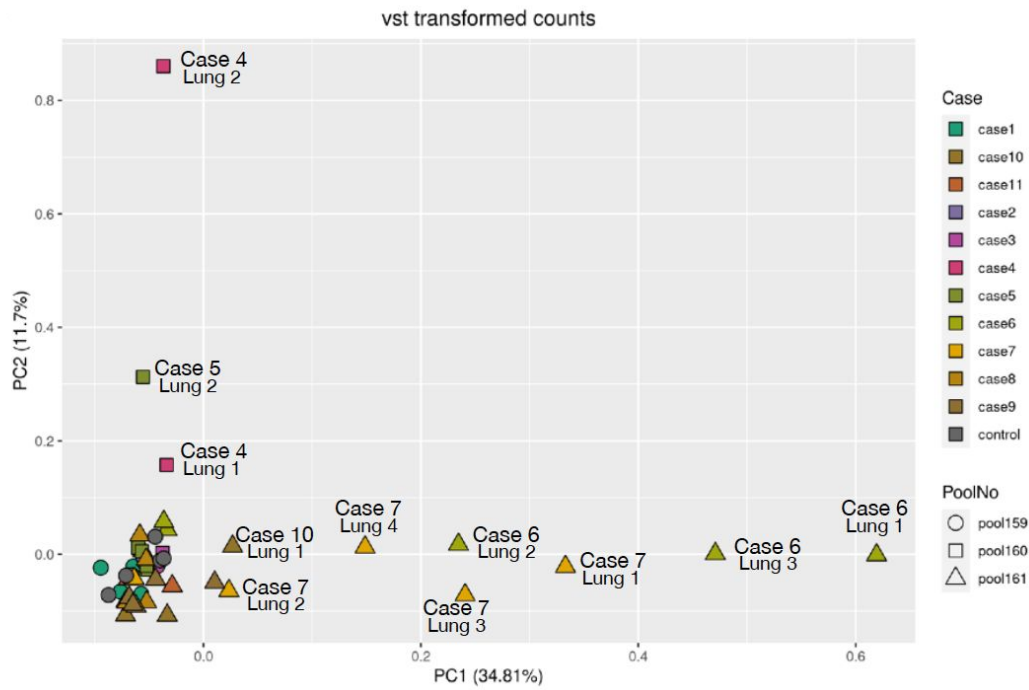**B**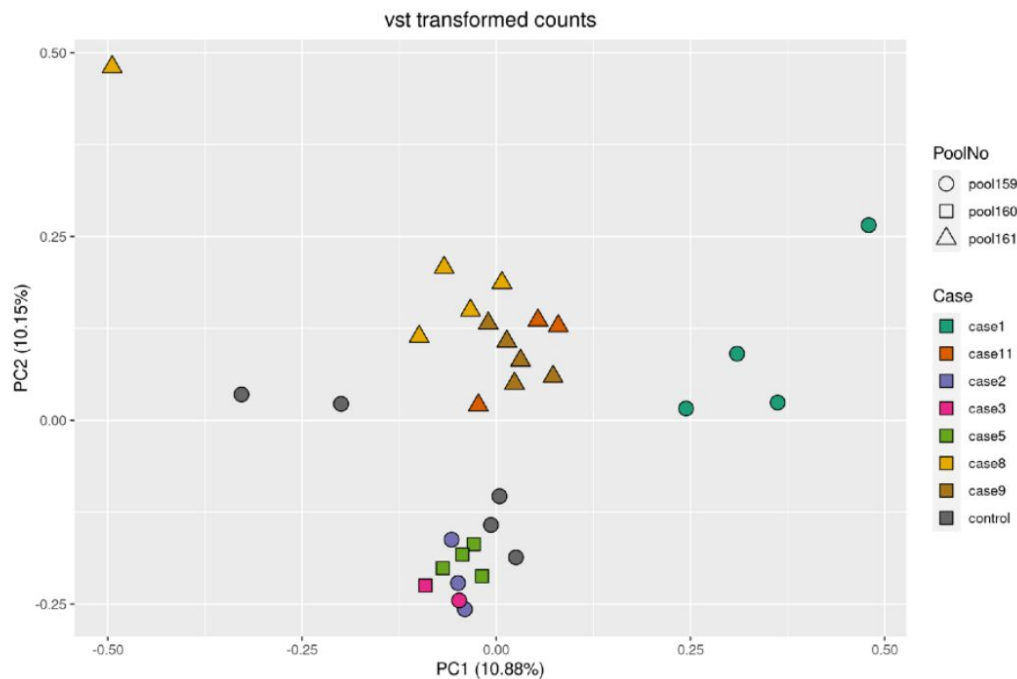

**Supplementary Figure 6. PCA plots for samples from the dataset GSE150316.** A) PCA was performed based on the transformed values obtained after applying the variance stabilizing transformation<sup>28</sup> implemented in the `vst()` function of `DESeq2`<sup>27</sup>. Four outlier samples (Cases 4, 6, 7 and 10) were identified and discarded. B) PCA was repeated after discarding these samples. PCA: Principal Component Analysis.

| Comparison                                     | Number of significant isoforms | Number of genes |
|------------------------------------------------|--------------------------------|-----------------|
| Series1 NHBE Mock vs Series1 NHBE SARS CoV 2   | 145                            | 101             |
| Series2 A549 Mock vs Series2 A549 SARS CoV 2   | 82                             | 54              |
| Series3 A549 Mock vs Series3 A549 RSV          | 1281                           | 710             |
| Series4 A549 Mock vs Series4 A549 IAV          | 1690                           | 956             |
| Series5 A549 Mock vs Series5 A549 SARS CoV 2   | 172                            | 105             |
| Series7 Calu3 Mock vs Series7 Calu3 SARS CoV 2 | 133                            | 86              |
| Series8 A549 Mock vs Series8 A549 HPIV3        | 165                            | 109             |
| Series8 A549 Mock vs Series8 A549 RSV          | 148                            | 101             |
| Series9 NHBE Mock vs Series9 NHBE IAV          | 48                             | 32              |
| Combined                                       | 3569                           | 1960            |

**Supplementary Table 1. Isoform analysis summary.** Summary results for the number of significant isoforms and corresponding genes quantified. Significant isoforms were identified by exhibiting a change in usage greater than or equal to 30% in absolute value ( $dIF \geq |0.3|$ ) and an adjusted p-value of 0.05.



| ID          | start | end   | strand | sequence | RBP                           | region     | Genomes | Fraction of genomes |
|-------------|-------|-------|--------|----------|-------------------------------|------------|---------|---------------------|
| NC_045512.2 | 85    | 91    | +      | TGTGTGG  | CELF5, RBM24                  | 5' UTR     | 173442  | 0.9582272117        |
| NC_045512.2 | 154   | 160   | +      | TGACAGG  | FMR1                          | 5' UTR     | 175669  | 0.9705308752        |
| NC_045512.2 | 159   | 165   | +      | GGACACG  | FMR1                          | 5' UTR     | 175713  | 0.9707739651        |
| NC_045512.2 | 235   | 240   | +      | AGGTTT   | ZRANB2                        | 5' UTR     | 176643  | 0.9759120015        |
| NC_045512.2 | 247   | 253   | +      | GGTGTGA  | RBM24                         | 5' UTR     | 175869  | 0.9716358292        |
| NC_045512.2 | 259   | 264   | +      | AGGTAA   | ZRANB2                        | 5' UTR     | 176118  | 0.973011497         |
| NC_045512.2 | 21552 | 21557 | +      | CTAAAC   | KHDRBS1                       | intergenic | 179409  | 0.9911935161        |
| NC_045512.2 | 21556 | 21562 | +      | ACGAACA  | PABPC1                        | intergenic | 179423  | 0.9912708629        |
| NC_045512.2 | 26469 | 26474 | +      | CTAAAC   | KHDRBS1                       | intergenic | 180659  | 0.998099479         |
| NC_045512.2 | 26478 | 26483 | +      | CTAAAT   | KHDRBS1                       | intergenic | 180688  | 0.9982596974        |
| NC_045512.2 | 26479 | 26484 | +      | TAAATA   | PPIE                          | intergenic | 180683  | 0.9982320735        |
| NC_045512.2 | 26480 | 26485 | +      | AAATAT   | PPIE                          | intergenic | 180625  | 0.9979116368        |
| NC_045512.2 | 26481 | 26486 | +      | AATATT   | PPIE                          | intergenic | 180611  | 0.99783429          |
| NC_045512.2 | 26482 | 26487 | +      | ATATTA   | PPIE                          | intergenic | 180601  | 0.9977790423        |
| NC_045512.2 | 26483 | 26488 | +      | TATTAT   | PPIE                          | intergenic | 180601  | 0.9977790423        |
| NC_045512.2 | 26484 | 26489 | +      | ATTATA   | PPIE                          | intergenic | 180601  | 0.9977790423        |
| NC_045512.2 | 26484 | 26487 | +      | ATTA     | TIAL1                         | intergenic | 180615  | 0.9978563891        |
| NC_045512.2 | 26485 | 26490 | +      | TTATAT   | PPIE                          | intergenic | 180596  | 0.9977514185        |
| NC_045512.2 | 26486 | 26491 | +      | TATATT   | PPIE                          | intergenic | 180568  | 0.9975967249        |
| NC_045512.2 | 26487 | 26492 | +      | ATATTA   | PPIE                          | intergenic | 180632  | 0.9979503102        |
| NC_045512.2 | 26489 | 26492 | +      | ATTA     | TIAL1                         | intergenic | 180649  | 0.9980442313        |
| NC_045512.2 | 26490 | 26496 | +      | TTAGTTT  | ELAVL1                        | intergenic | 180580  | 0.9976630222        |
| NC_045512.2 | 26493 | 26498 | +      | GTTTTT   | TIA1, ELAVL2, CELF2           | intergenic | 180553  | 0.9975138534        |
| NC_045512.2 | 26493 | 26499 | +      | GTTTTTC  | TIA1, ELAVL2, TIAL1           | intergenic | 180514  | 0.9972983873        |
| NC_045512.2 | 26494 | 26499 | +      | TTTTTC   | TIA1, ELAVL2, TIAL1           | intergenic | 180532  | 0.9973978332        |
| NC_045512.2 | 26494 | 26498 | +      | TTTTT    | CELF2                         | intergenic | 180571  | 0.9976132992        |
| NC_045512.2 | 26500 | 26504 | +      | TGTTT    | CELF2                         | intergenic | 180495  | 0.9971934167        |
| NC_045512.2 | 26501 | 26505 | +      | GTTTG    | TIAL1, TIA1                   | intergenic | 180506  | 0.9972541892        |
| NC_045512.2 | 26502 | 26508 | +      | TTTGAA   | EIF4B                         | intergenic | 180517  | 0.9973149616        |
| NC_045512.2 | 26509 | 26513 | +      | CTTTA    | ELAVL2, TIAL1, TIA1           | intergenic | 180625  | 0.9979116368        |
| NC_045512.2 | 26510 | 26515 | +      | TTTAAT   | PPIE                          | intergenic | 180639  | 0.9979889836        |
| NC_045512.2 | 26511 | 26516 | +      | TTAATT   | PPIE                          | intergenic | 180645  | 0.9980221322        |
| NC_045512.2 | 26512 | 26517 | +      | TAATTT   | PPIE                          | intergenic | 180655  | 0.9980773799        |
| NC_045512.2 | 26513 | 26518 | +      | AATTTT   | PPIE                          | intergenic | 180677  | 0.9981989249        |
| NC_045512.2 | 26514 | 26519 | +      | ATTTTA   | PPIE, TIA1, ELAVL2, TIAL1     | intergenic | 180694  | 0.998292846         |
| NC_045512.2 | 27383 | 27388 | +      | ATTAAA   | PPIE                          | intergenic | 179804  | 0.9933758004        |
| NC_045512.2 | 27384 | 27389 | +      | TTAAAC   | KHDRBS1                       | intergenic | 179742  | 0.9930332646        |
| NC_045512.2 | 27388 | 27394 | +      | ACGAACA  | PABPC1                        | intergenic | 180525  | 0.9973591598        |
| NC_045512.2 | 27884 | 27889 | +      | CTAAAC   | KHDRBS1                       | intergenic | 179777  | 0.9932266316        |
| NC_045512.2 | 27888 | 27894 | +      | ACGAACA  | PABPC1                        | intergenic | 179769  | 0.9931824334        |
| NC_045512.2 | 28256 | 28261 | +      | CTAAAC   | KHDRBS1                       | intergenic | 180576  | 0.9976409231        |
| NC_045512.2 | 28260 | 28266 | +      | ACGAACA  | PABPC1                        | intergenic | 180869  | 0.9992596808        |
| NC_045512.2 | 28269 | 28274 | +      | CTAAAA   | KHDRBS1                       | intergenic | 180816  | 0.998966868         |
| NC_045512.2 | 28270 | 28275 | +      | TAAAAT   | PPIE                          | intergenic | 180883  | 0.9993370276        |
| NC_045512.2 | 29530 | 29535 | +      | CTAAAC   | KHDRBS1                       | intergenic | 180028  | 0.994613349         |
| NC_045512.2 | 29680 | 29685 | +      | TTTAAT   | PPIE                          | 3'UTR      | 177005  | 0.9779119683        |
| NC_045512.2 | 29698 | 29704 | +      | TTAGGGA  | HNRNPA1, HNRNPA1L2, HNRNPA2B1 | 3'UTR      | 174955  | 0.9665861892        |
| NC_045512.2 | 29699 | 29704 | +      | TAGGGA   | HNRNPA1                       | 3'UTR      | 174974  | 0.9666911598        |
| NC_045512.2 | 29701 | 29707 | +      | GGGAGGA  | LIN28A                        | 3'UTR      | 174934  | 0.966470169         |
| NC_045512.2 | 29743 | 29749 | +      | CGGAGTA  | LIN28A                        | 3'UTR      | 172413  | 0.9525422231        |

**Supplementary Table 2.** Conservation of binding motifs for human RBPs across genome sequences of SARS-CoV-2 isolates. Conserved binding sites are listed along with the number and fraction of genomes in which the sequence is conserved. RBP: RNA Binding Protein.
