# Supplementary material for: Genome-wide bioinformatic analyses predict key host and viral factors in SARS-CoV-2 pathogenesis
Source: PubMed Central journal article supplement (PMC8128904; doi:10.1038/s42003-021-02095-0), 2021-05-17
Supplement: 42003_2021_2095_MOESM2_ESM.pdf [file 42003_2021_2095_MOESM2_ESM.pdf]

## Description of Additional Supplementary Files

**File name:** Supplementary Data 1

**Description:** List of RNA-seq samples. Description and availability of the RNA-seq samples used in our study.

**File name:** Supplementary Data 2

**Description:** Additional lists of differentially expressed genes (DEGs):

- a) List of 73 selected DEGs consistently and specifically altered in SARS-CoV-2 infection.
- b) DEGs present in Cell Lines infected with SARS-CoV-2 and not detected in cell lines infected with IAV, RSV and HPIV3.
- c) DEGs detected in all datasets including lung biopsies.

**File name:** Supplementary Data 3

**Description:** Results of differential gene expression analysis. Zipped file containing the complete results of differential gene expression analysis for all samples.

**File name:** Supplementary Data 4

**Description:** GO term enrichment results. Zipped file containing the results of GO term enrichment for all samples.

**File name:** Supplementary Data 5

**Description:** Results of functional enrichment analyses specific to SARS-CoV-2 infection:

- a) GO enrichment analysis for DEGs specific in SARS-CoV-2 datasets.
- b) Common and unique GO terms across all viral datasets analysed.
- c) Detailed information for GO terms specific to each cell line infected with SARS-CoV-2.

**File name:** Supplementary Data 6

**Description:** Results of pathway enrichment for each dataset. Results of SPIA and DAVID analyses merged into one file.

**File name:** Supplementary Data 7

**Description:** Metabolic flux changes predicted for each dataset using Moomin.

**File name:** Supplementary Data 8

**Description:** Results of differential isoform analyses.

- a) Differential gene expression, isoform expression and isoform usage data between conditions.
- b) Output of all transcript features analyzed for the biological consequence enrichment analysis between conditions.
- c) Occurrences of alternative splicing events for each transcript.
- d) Protein domain types, locations and significance scoring.
- e) Quantification and categorization for intrinsically disordered regions classification.
- f) Changes in the presence and positioning of open reading frames across transcripts.

**File name:** Supplementary Data 9

**Description:** Transposable Element (TE) expression analysis. Zipped file containing the results of read count quantification and differential expression analysis for TE families in all cell line samples.

**File name:** Supplementary Data 10

**Description:** Functional enrichment of genes near Differentially Expressed Transposable Elements (DETEs). Zipped file containing the results of GREAT functional enrichment analysis (complete and per family) for all cell line samples.

**File name:** Supplementary Data 11

**Description:** Putative binding sites for human RBPs on the SARS-CoV-2 genome.

**File name:** Supplementary Data 12

**Description:** RNA Binding Protein (RBP) motif enrichment in SARS-CoV-2. Enrichment or depletion of binding motifs for human RBPs on the SARS-CoV-2 genome.

**File name:** Supplementary Data 13

**Description:** Biological evidence associated with candidate RBPs. Biological evidence from various sources, associated with the putative SARS-CoV-2 interacting human RBPs.

**File name:** Supplementary Data 14

**Description:** RNA Binding Protein (RBP) motif enrichment in SARS-CoV. Enrichment or depletion of binding motifs for human RBPs on the SARS-CoV genome.

**File name:** Supplementary Data 15

**Description:** RNA Binding Protein (RBP) motif enrichment in RaTG13. Enrichment or depletion of binding motifs for human RBPs on the RaTG13 genome.

**File name:** Supplementary Data 16

**Description:** Association of viral variants with patient information. Zipped file containing results of Chi-squared analyses to associate viral genome sequence variants with patient age range, biological sex, and disease severity.

**File name:** Supplementary Data 17

**Description:** Categorization of patients by disease status. Normalization of patient status into four categories: mild, moderate, severe and NA.

**File name:** Supplementary Data 18

**Description:** Supporting information for Figures 2 and 3. Data necessary to replicate figures 2b, 2c, 2d, 3b, and 3c.
